# Supplementary material for: Prediction of Adverse Post-Infarction Left Ventricular Remodeling Using a Multivariate Regression Model
Source: MDPI journal article supplement (doi:10.3390/diagnostics12030770), 2022-03-21
Supplement: s1 [file s1]

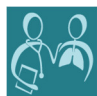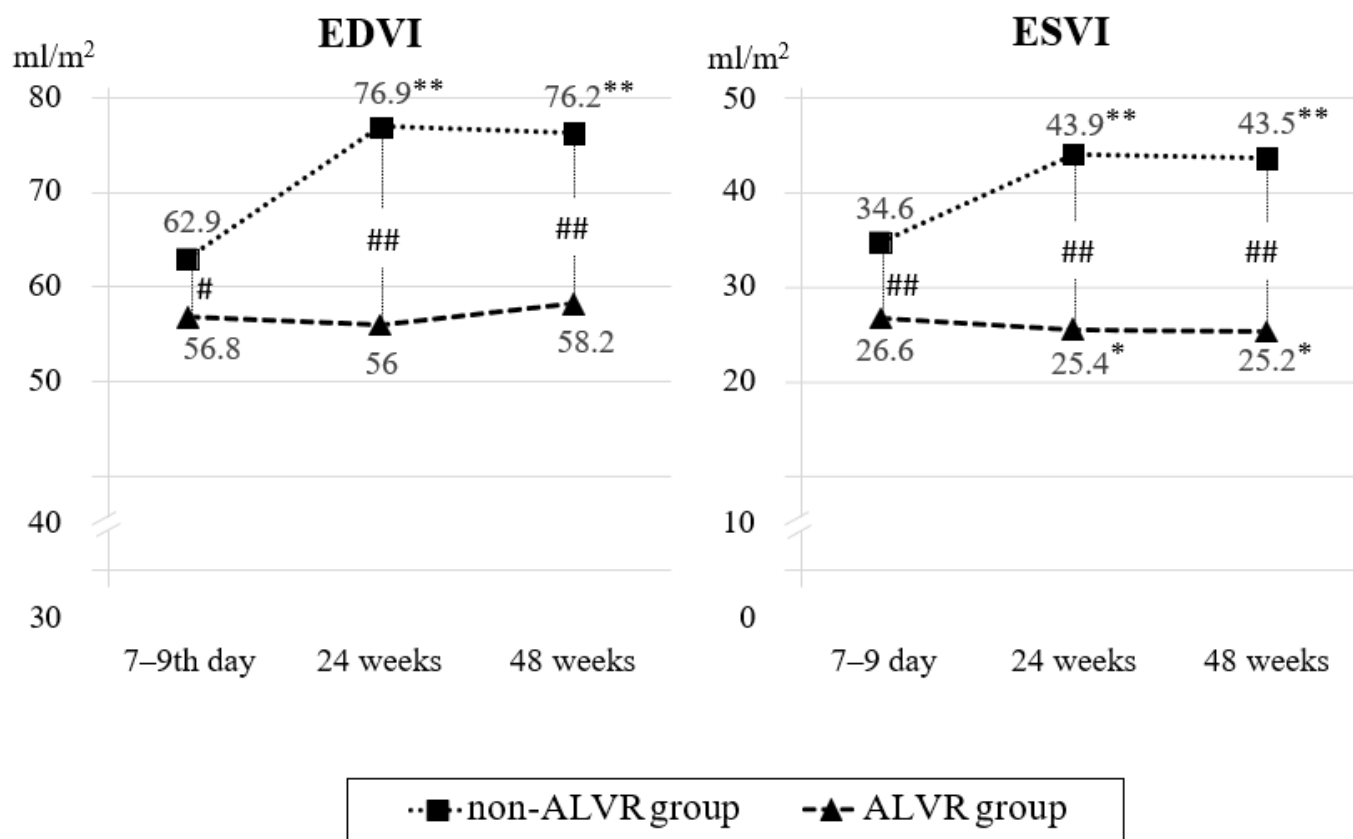

**Figure S1.** Dynamics of indexed values of EDV and ESV in the comparison groups. Note: \*  $p < 0.05$ , \*\*  $p < 0.01$ —significant differences between the values on days 7–9 and subsequent visits; #  $p < 0.05$ , ##  $p < 0.01$ —significant intergroup differences; EDVI, end diastolic volume index; ESVI, end systolic volume index.
